1 **Title: Identification of QTLs for dynamic and steady state photosynthetic**  
2 **traits in a barley mapping population**

3

4 William T. Salter<sup>1,\*†</sup> ([william.salter@sydney.edu.au](mailto:william.salter@sydney.edu.au))

5 Si Li<sup>1,†</sup> ([si.li@sydney.edu.au](mailto:si.li@sydney.edu.au))

6 Peter M. Dracatos<sup>2</sup> ([peter.dracatos@sydney.edu.au](mailto:peter.dracatos@sydney.edu.au))

7 Margaret M. Barbour<sup>1,3</sup> ([margaret.barbour@waikato.ac.nz](mailto:margaret.barbour@waikato.ac.nz))

8

9 <sup>1</sup> School of Life and Environmental Sciences, Sydney Institute of Agriculture, The University  
10 of Sydney, Brownlow Hill, NSW 2570, Australia.

11 <sup>2</sup> Plant Breeding Institute, The University of Sydney, Cobbitty, NSW, 2570, Australia.

12 <sup>3</sup> School of Science, University of Waikato, Hillcrest, Hamilton 3216, New Zealand.

13

14 \* Corresponding author: +61481198806

15 † Equal contributions

16

17 Submission date: 10/8/2020

18 Word count: 4834

19 Number of tables: 2

20 Number of figures: 7

21 Supplementary figures: 5

22 Supplementary files: 1

23

24 **Highlight**

25 Significant variation exists in the photosynthetic induction response after a switch from  
26 moderate to saturating light across a barley doubled haploid population. A QTL for rubisco  
27 activation rate was identified on chromosome 7H, as well as overlapping QTLs for steady  
28 state photosynthesis and stomatal conductance.

29

30 **Abstract**

31 Enhancing the photosynthetic induction response to fluctuating light has been suggested as  
32 a key target for improvement in crop breeding programs, with the potential to substantially  
33 increase whole canopy carbon assimilation and contribute to crop yield potential. Rubisco  
34 activation may be the main physiological process that will allow us to achieve such a goal. In  
35 this study, we phenotypically assessed the rubisco activation rate in a doubled haploid (DH)  
36 barley mapping population [131 lines from a Yerong/Franklin (Y/F) cross] after a switch from  
37 moderate to saturating light. Rates of rubisco activation were found to be highly variable  
38 across the mapping population, with a median activation rate of  $0.1 \text{ min}^{-1}$  in the slowest  
39 genotype and  $0.74 \text{ min}^{-1}$  in the fastest genotype. A QTL for rubisco activation rate was  
40 identified on chromosome 7H. This is the first report on the identification of a QTL for  
41 rubisco activation rate *in planta* and the discovery opens the door to marker assisted  
42 breeding to improve whole canopy photosynthesis of barley. Further strength is given to  
43 this finding as this QTL colocalised with QTLs identified for steady state photosynthesis and  
44 stomatal conductance. Several other distinct QTLs were identified for these steady state  
45 traits, with a common overlapping QTL on chromosome 2H, and distinct QTLs for  
46 photosynthesis and stomatal conductance identified on chromosomes 4H and 5H  
47 respectively. Future work should aim to validate these QTLs under field conditions so that  
48 they can be used to aid plant breeding efforts.

49

50 **Keywords:** barley, dynamic photosynthesis, genotyping, mapping, phenotyping, rubisco  
51 activation, sunfleck.

52

53

## 54 **Introduction**

55 By 2050, the global population is expected to rise to 9 billion and to meet future food  
56 demand we will need to increase crop production worldwide by 70% (Paul et al., 2019).  
57 Recent progress has been hindered by stagnating rates of annual yield increase, therefore  
58 novel breeding targets to improve crop yield potential are urgently needed. Improving the  
59 photosynthetic efficiency of crop species has now been shown to boost plant growth under  
60 field conditions (Kromdijk et al., 2016; South et al., 2019). Whilst these studies used genetic  
61 transformation to achieve such gains, they have proven that significant photosynthetic gains  
62 are possible in the field and that these can contribute to plant growth and crop yield. It is  
63 now imperative that we identify natural variation in photosynthetic traits in diverse  
64 populations and harness this variation through marker-assisted plant breeding techniques  
65 (Furbank et al., 2020).

66

67 Improving photosynthetic efficiency in dynamic environments has recently been highlighted  
68 as a key target to increase whole canopy carbon assimilation (Murchie et al., 2018). The  
69 light environment of the lower canopy is subject to continuous and dynamic change across  
70 the course of a day, caused by movement of the sun across the sky, sporadic cloud cover  
71 and/or movement of upper elements in the canopy caused by wind (Slattery et al., 2018).  
72 These processes can cause a leaf in low/moderate light one moment to suddenly be  
73 exposed to saturating light conditions the next. Often these short periods of direct sunlit  
74 illumination (referred to herein as 'sunflecks') only last a short period of time, in the order  
75 of seconds to minutes, yet they can account for as much as 90% of the daily accumulated  
76 light of lower canopy leaves (Pearcy, 1990). Photosynthesis under these dynamic light  
77 conditions is highly inefficient. Specifically, the rates of stomatal opening and activation of  
78 rubisco upon transition from low to high light significantly limit carbon assimilation.

79 Interactive effects of several environmental factors on stomatal aperture are common in the  
80 field (Zeiger & Zhu, 1998; Talbott et al., 2003; Wang et al., 2008), meaning that stomata are  
81 operating in an integrated and hierarchical manner in response to multiple environmental  
82 stimuli (Lawson & Blatt, 2014). Stomatal responses to fluctuating light are therefore  
83 considered to be a much more challenging target for improvement than the biochemical  
84 limitations to photosynthesis (for a comprehensive review of limitations to dynamic  
85 photosynthesis see Kaiser et al., 2019).

86

87 Improving rubisco activation rate could be the low hanging fruit that allows plant breeders  
88 to boost whole canopy photosynthesis with few associated costs, specifically in terms of  
89 water and nutrient use. This is critical for a future where global environmental change is  
90 predicted to leave agricultural systems exposed to more frequent and more extreme  
91 drought and heat events. It has been estimated that we could increase daily carbon gain by  
92 as much as 21% in wheat if rubisco activation was instantaneous (Taylor & Long, 2017).

93 Variation in rubisco activation kinetics has now been observed in crop species including  
94 soybean (Soleh et al., 2017), rice (Acevedo-Siaca et al., 2020) and wheat (Salter et al., 2019),  
95 and work with other species has indicated specific molecular targets and pathways that  
96 could accelerate rubisco activation speed, with a particular focus on rubisco's catalytic  
97 chaperone rubisco activase (Rca) (in *Arabidopsis thaliana*, Mott et al., 1997; in *Nicotiana*  
98 *tabacum*, Hammond et al., 1998; and in *Oryza sativa*, Yamori et al., 2012). In our recent  
99 work with wheat, we found that by increasing the rate of rubisco activation of the slowest  
100 genotype included in our study to that of the fastest, daily carbon assimilation could be  
101 increased by 3.4% (Salter et al., 2019). However, in this work only ten genotypes of wheat  
102 were studied, the potential for improvement would likely be far more substantial if we were  
103 to investigate variation in this trait across a whole breeding population, and greater still if  
104 we were to investigate diversity within cultivars from diverse geographic locations or  
105 landraces.

106

107 Most recent studies of photosynthetic induction have tended to adopt the so-called  
108 'dynamic  $A/c_i$ ' method (Taylor & Long, 2017; Salter et al., 2019), in which photosynthetic  
109 induction curves are measured at a number of different  $CO_2$  concentrations, allowing for the  
110 reconstruction of  $A/c_i$  curves throughout the induction response. Whilst this technique  
111 yields important fundamental data on the biochemical limitations during photosynthetic  
112 induction (most importantly rubisco carboxylation capacity,  $V_{cmax}$ ; and potential electron  
113 transport rate,  $J$ ), it takes a very long time (> 6 hours per plant) and thus limits its use in  
114 large scale screenings for photosynthetic induction traits. Conversely, other techniques that  
115 yield less detailed information about the underlying physiology (such as that used by Soleh  
116 et al., 2016) take far less time (< 1 hour) and may be much more suitable for large-scale  
117 screenings of diverse plant material. The method of Soleh et al. (2016) involves measuring a

118 single photosynthetic induction curve at a low intracellular CO<sub>2</sub> concentration (i.e. < 300  
119 μmol mol), at which it can be assumed that photosynthetic biochemistry is limited by  
120 rubisco rather than by electron transport. This allows for the reliable estimation of rubisco  
121 activation rate, with data comparable to those obtained using the ‘dynamic A/c<sub>i</sub>’ method  
122 (Taylor & Long, 2017).

123

124 We hypothesize that variation in photosynthetic induction kinetics may be inadvertently  
125 confounding efforts to improve steady state properties of photosynthesis. Steady state  
126 measurement techniques [such as spot measurements of photosynthesis (A) and stomatal  
127 conductance (g<sub>s</sub>), CO<sub>2</sub> response curves and light response curves] all rely on the assumption  
128 that the leaf is fully acclimated to saturating light, and other environmental conditions  
129 inside the leaf chamber of the system, prior to measurement. Thus, these methods require  
130 a delay for the leaf to become equilibrated to the conditions inside the leaf chamber of the  
131 gas exchange system (referred to herein as the equilibration time). Although it is quite well  
132 established that adequate equilibration time is required for accuracy of steady state gas  
133 exchange measurements, an increasing demand for faster, higher throughput measurement  
134 techniques (Furbank & Tester, 2011) may make researchers complacent. Yet, few studies  
135 have quantitatively assessed the potential implications that may result from premature  
136 assumptions of steady state conditions, for instance, the identification of false quantitative  
137 trait loci (QTLs).

138

139 There is now compelling evidence that suggests whole canopy photosynthesis could be  
140 improved by harnessing natural variation in rubisco activation rate that exists across  
141 genotypes of crop species. However, no study to date has investigated or performed trait  
142 dissection for rubisco activation in a segregating mapping population. We sought to identify  
143 and characterise genetic variation in rubisco activation rate across a barley (*Hordeum*  
144 *vulgare* L.) doubled haploid (DH) mapping population *in planta* using gas exchange  
145 techniques. We then used chromosome interval mapping to identify QTLs and closely  
146 associated molecular markers. We were also interested in assessing whether false positive  
147 and/or false negative QTLs would be identified for “steady-state” photosynthetic properties  
148 (A and g<sub>s</sub>) if equilibration times were not long enough for steady state conditions to be  
149 reached.

150

151 **Methods**

152 *Plant material and growth conditions*

153 A DH barley (*H. vulgare* L.) population was obtained from a cross between the Australian  
154 barley cultivars Yerong and Franklin (Y/F). This population contained 177 DH lines and was  
155 maintained at the Plant Breeding Institute at The University of Sydney. The Y/F mapping  
156 population has been extensively used for QTL mapping for both morphological (Xue et al.  
157 2008) and physiological (Zhang et al. 2016) traits, as well as disease resistance (Singh et al.  
158 2014; Dracatos et al. 2016). In this study 131 lines from this population were phenotypically  
159 assessed for steady state and dynamic photosynthetic traits. Due to the availability of seed  
160 and genotypic data, only 127 DH lines were used for QTL analyses. A second DH barley  
161 population (from a cross between VB9104 and Dash) was also phenotyped for  
162 photosynthetic traits however due to the low number of lines with available genotypic data  
163 this population was not included in further analyses (phenotyping results are however  
164 presented in Figures S4 and S5).

165

166 Plants were grown in a controlled environment room for approximately five weeks prior to  
167 measurement. Day temperature was 25°C during a 14 h light period and night temperature  
168 was 17°C during a 10 h dark period. Relative humidity was maintained at 70% while daytime  
169 PPF was approximately 600  $\mu\text{mol m}^{-2}\text{s}^{-1}$  at the top of the plants. Seeds were planted in  
170 potting mix enriched with slow-release fertilizer (Osmocote Exact, Scotts, Sydney, NSW,  
171 Australia). Six seeds per genotype were sown in 6 L pots and grown for three weeks before  
172 being thinned to three plants per pot. Seed was sown sequentially in time to make sure that  
173 all measurements were conducted at the same growth stage. Plants were watered daily to  
174 field capacity.

175

176 *Photosynthetic measurements*

177 Plants were moved from the controlled environment room to a temperature-controlled  
178 growth cabinet [temperature 25°C; relative humidity 70%]. Two or three of the youngest  
179 fully expanded leaves of a single plant were sealed in a 2x6 cm leaf cuvette (Li6400 11; LI-  
180 COR, Lincoln, NE, USA) fitted to a LI-COR LI-6400XT gas exchange system to fill the cuvette  
181 without overlapping. This simulated an instantaneous shift in light intensity from 600  $\mu\text{mol}$   
182  $\text{m}^{-2}\text{s}^{-1}$  to 1300  $\mu\text{mol m}^{-2}\text{s}^{-1}$ , similar to the conditions experienced by a lower canopy leaf

183 during a sunfleck. Chamber conditions were set to closely match those of the controlled  
184 environment room [leaf temperature 25°C; cuvette CO<sub>2</sub> (C<sub>a</sub>) 400 μmol mol<sup>-1</sup>; relative  
185 humidity 70%], with the exception of PPF which was set to 1300 μmol m<sup>-2</sup> s<sup>-1</sup> using a red-  
186 green-blue light source (Li6400 18A; LI-COR) set to 10% blue and 90% red light.  
187 Measurements of photosynthetic gas exchange rates (*A* and *g<sub>s</sub>*) were recorded once per  
188 minute immediately after the leaf was inserted into the chamber until photosynthesis had  
189 reached steady state. Preliminary photosynthetic light response curves were measured with  
190 plants grown under the same conditions to ensure that 1300 μmol m<sup>-2</sup> s<sup>-1</sup> was saturating  
191 and that 600 μmol m<sup>-2</sup> s<sup>-1</sup> was non-saturating (results shown in Figure S1).

192

193 Rubisco activation rate was calculated using a modified method of Soleh et al. (2016).  
194 Photosynthetic data was first normalised to an assumed intercellular CO<sub>2</sub> concentration (*c<sub>i</sub>*)  
195 of 300 μmol mol<sup>-1</sup>, using the following equation:

196

$$197 \quad A^* = A \times \frac{300}{c_i}$$

198

199 where *A*<sup>\*</sup> is the normalised photosynthetic rate, *A* is the measured photosynthetic rate and  
200 *c<sub>i</sub>* is the measured intercellular CO<sub>2</sub> concentration. This effectively removed the influence of  
201 stomatal opening/closure for the induction phase. The initial rubisco activation rate (1/τ)  
202 was modelled from the plot of the logarithmic difference between *A*<sup>\*</sup> and its maximum  
203 value after induction (*A*<sup>\*</sup><sub>max</sub>) against the time taken for induction (representative data shown  
204 in Figure 1). From this plot, the value of 1/τ was determined from the slope of the linear  
205 regression on data points in the range of 2 to 5 mins after induction, and points after this  
206 that aligned well with these initial points (with an R<sup>2</sup> > 90%).

### 207 *Genetic analysis and QTL mapping*

208 The genotypic data and genetic linkage map for the Yerong/Franklin DH population used for  
209 QTL analysis for rubisco activity and steady state photosynthetic traits in the present study  
210 was previously described by Singh et al. (2015). In brief, the Y/F genetic map is comprised of  
211 496 DarT and 28 microsatellite (SSR) markers spanning 1,127cM across all seven  
212 chromosomes, 1H to 7H (Wenzl et al., 2006).

213

214 A subset of 127 lines were selected for QTL mapping analysis. Markers were selected every  
215 10 cM so that the whole genome was evenly covered. Composite interval mapping (CIM)  
216 methods were used in QTL Cartographer version 2.5 (North Carolina State University,  
217 Raleigh, NC, USA), carrying out 1,000 iterations permutation analysis with steps at 1 cM, and  
218 with a 0.05 confidence level for all traits.

219

#### 220 *Statistical analyses*

221 All other modelling and statistical analyses were performed in R (R Core Team, 2019).

222

223



## 224 **Results**

### 225 *Photosynthetic induction kinetics*

226 While specific photosynthetic induction kinetics were found to vary across individual leaves  
227 and genotypes, general trends were quite clear (representative induction curves from one  
228 day of measurements is shown in Figure 2). Net photosynthesis ( $A$ ) increased immediately  
229 after transition from to saturating light for all leaves. Stomatal responses were more  
230 variable than those of photosynthesis but there tended to be an initial reduction in  $g_s$  after  
231 transition to saturating light and then a gradual rise towards steady state. By normalising  
232 photosynthesis to a constant  $c_i$  of 300 ppm, we were able to obtain a measure of  
233 photosynthesis limited by rubisco carboxylation unobstructed by variation in stomatal  
234 kinetics ( $A^*$ ).  $A^*$  showed a similar trend to  $A$ , increasing immediately after the switch from  
235 low to high light.

236

### 237 *QTLs for rubisco activation rate*

238 Rubisco activation rates of the parental lines Yerong and Franklin were found to differ, with  
239 within-genotype medians of  $0.38 \text{ min}^{-1}$  and  $0.74 \text{ min}^{-1}$  respectively. Wide variation in  $1/\tau$   
240 was found across the population (Figure 3), with within-genotype medians ranging from  
241  $0.099 \text{ min}^{-1}$  to  $0.74 \text{ min}^{-1}$ . Interestingly, the parental line Franklin was found to have the  
242 fastest rate of rubisco activation. A frequency distribution of  $1/\tau$  was plotted for the  
243 population and was found to follow a normal distribution suggesting that rubisco activation  
244 rate was under complex genetic control (Figure S2). CIM analysis revealed the presence of a  
245 distinct QTL for rubisco activation rate (Figure 4; further details in Table 1).  $Q1/\tau.\text{sun-7H}$ ,  
246 was located at 41.67 cM on chromosome 7H (proximal to DarT marker bPb-9601 marker)  
247 accounting for 10.48% of the phenotypic variance in this trait.

248

### 249 *Steady state photosynthesis and equilibration time tests*

250 Variation was also found in steady state photosynthetic rates across the population (Figure  
251 5). Median rates of  $A$  and  $g_s$  were  $17.45 \mu\text{mol m}^{-2} \text{ s}^{-1}$  and  $0.31 \text{ mmol m}^{-2} \text{ s}^{-1}$ , respectively.  
252 From this phenotyping data, there was no correlation found between steady state  $A$  and  $1/\tau$   
253 ( $p > 0.05$ ; Figure 6).

254

255 As hypothesized, “steady-state” photosynthetic rates were substantially underestimated if  
256 measurements were recorded without sufficient equilibration time (Table 2). This was more  
257 pronounced the earlier the measurements were recorded after enclosing the leaf in the  
258 chamber of the IRGA. Mean values of  $A$  and  $g_s$  were both underestimated by 21% at five  
259 minutes compared to steady state. It should be noted that although some of the fastest  
260 genotypes reached steady state after five minutes, most of the lines did not. In fact,  $g_s$  was  
261 underestimated by 82% for one of the genotypes and  $A$  was underestimated by 54% for  
262 another if measurements were recorded after just five minutes.

263

264 To assess the importance of equilibration time for accurate identification of steady state  
265 QTLs, QTL mapping was first performed for steady state  $A$  and  $g_s$ . Frequency distributions  
266 were plotted for both traits and they followed a normal distribution suggesting they are  
267 under complex genetic control (Figure S3). Several QTL were found for both  $A$  and  $g_s$  (Table  
268 1). Trait co-location was observed on chromosome 7H whereby the position of the  
269 Q1/ $\tau$ .sun-7H QTL was almost identical to QTL for both  $A$  and  $g_s$ . This suggests a region on  
270 the short arm of chromosome 7H either carries a single gene or more likely a cluster of  
271 genes responsible for the genetic control of photosynthesis, stomatal conductance and  
272 rubisco activation. For steady state  $A$  and  $g_s$ , additional overlapping and distinct QTL were  
273 identified. A common overlapping QTL for both  $A$  and  $g_s$  was identified, peaking at 27.03 cM  
274 on chromosome 2H, whilst distinct QTL were identified on chromosomes 4H (41.67 cM) and  
275 5H (53.39 cM) for  $A$  and  $g_s$  respectively.

276

277 QTL mapping was then performed with data collected at five, ten and fifteen minutes after  
278 the start of induction for comparison with detected steady state QTLs (coloured traces in  
279 Figure 7). Although most QTL were still identified with non-steady state data, the  
280 significance these QTL peaks were found to be weakened under non-steady state  
281 conditions. This was particularly evident for the  $g_s$  QTL identified on chromosome 7H (Figure  
282 7h), with the LOD score of this QTL dropping from 6.8 when using steady state data to 4.9,  
283 3.9 and 3.3 when using data collected at 15 min, 10 min and 5 min after the start of  
284 induction, respectively.

285

## 286 Discussion

287 We have identified QTLs for *in planta* rubisco activation rate for the first time in any species.  
288 As in other crops, we found rubisco activation rate to be a highly variable trait across  
289 genotypes of barley, aiding in the discovery of a significant QTL in our doubled haploid  
290 population. QTLs were also identified for steady state photosynthetic parameters, including  
291 co-localised QTLs for  $A$ ,  $g_s$  and  $1/\tau$  on chromosome 7H. The importance of adequate  
292 equilibration time in the measurement of steady state gas exchange was highlighted by  
293 comparing these results to those obtained using arbitrary non-steady state rates at 5, 10  
294 and 15 min after the start of induction. The significance of QTLs was reduced if steady state  
295 conditions had not been reached.

296

### 297 *Improving whole canopy photosynthesis*

298 It is well established that improving photosynthesis has the potential to increase crop yield  
299 (for a review of recent progress see Simkin et al., 2019). However, until now research has  
300 invariably focussed on only the uppermost leaves of the canopy under optimal conditions  
301 (i.e. continuous saturating light, 25°C). This approach has its merits because these leaves  
302 have the most light available to them and their contribution to whole canopy  
303 photosynthesis reflects this (Osborne et al. 1998). Yet, for monocot cereal species such as  
304 wheat and barley there have been few studies that have shown flag leaf photosynthesis to  
305 correlate well with crop yield (Richards et al., 2000). Whole canopy photosynthesis, and  
306 more specifically the cumulative rate of photosynthesis over the growing season, can be a  
307 much more reliable determinant of crop yield (Wu et al., 2019). Accordingly, there has been  
308 a recent shift in research focus towards dynamic photosynthetic traits. This is important  
309 because whilst some studies have found weak relationships between steady state and  
310 dynamic photosynthetic traits (Salter et al., 2019) other studies have not found any  
311 relationship (Soleh et al, 2017; Acevedo-Siaca et al., 2020). Our results also showed no link  
312 between steady state  $A$  and  $1/\tau$  (Figure 6), although the co-localisation of QTLs on  
313 chromosome 7H suggests they both may be controlled by the action of a single gene or a  
314 cluster of closely linked genes at the same chromosomal location.

315

316 Significant improvements in photosynthesis and resultant increases in plant growth have  
317 now been achieved under field conditions through genetic modification of model plant

318 species (15% increased biomass production by accelerating recovery from photoprotection,  
319 Kromdijk et al., 2016; and 40% increased biomass via engineering of a photorespiratory  
320 bypass, South et al., 2019) and recent modelling has highlighted the potential of improving  
321 several dynamic photosynthetic traits on whole canopy photosynthesis (Wang et al., 2020).  
322 It is important now that we explore and exploit natural variation in photosynthetic traits  
323 across plant populations (for review see Furbank et al., 2020). As in previous studies with  
324 other species, we identified significant variation in rubisco activation rate across barley  
325 genotypes. We identified a QTL for rubisco activation rate, as well as several QTLs for steady  
326 state  $A$  and  $g_s$ . Q1/ $\tau$ .sun-7H was flanked by the bpb-9601 DArT marker which has previously  
327 been associated with both grain yield and crop spike number in the Yerong/Franklin  
328 population (Xue et al., 2010). This marker is of particular interest as it also flanks QTLs that  
329 we identified for steady state  $A$  and  $g_s$  (QA.sun-7H and Q $g_s$ .sun-7H in Table 1), highlighting  
330 its utility for marker assisted selection (MAS). MAS exploiting natural variation between  
331 barley genotypes can now be achieved through the development of a high throughput  
332 codominant marker using the sequence information from the closely associated bpb-9601  
333 DArT marker identified in this study. MAS for both steady-state and dynamic photosynthetic  
334 traits in barley now provides potential to improve daily photosynthetic carbon gain in both  
335 sporadically sunlit lower canopy and fully sunlit upper canopy leaves, bolstering whole  
336 canopy photosynthesis and contributing to yield potential.

337

338 Whilst we observed segregation for three different photosynthetic traits in the barley  
339 mapping population studied, and the V/D population presented in Figures S4 and S5, these  
340 populations were not specifically developed to investigate photosynthesis. Future work in  
341 this area would hugely benefit from phenotyping a diverse panel of barley accessions to  
342 either develop additional trait-specific mapping populations using parents with contrasting  
343 photosynthetic properties or use a genome wide association scan (GWAS) approach to mine  
344 for novel favourable alleles based on natural variation in photosynthetic traits. This may also  
345 include the investigation of crop wild relatives (Castañeda-Álvarez, 2016). Such approaches  
346 have already yielded promising outcomes for other desirable traits in crop species, including  
347 salinity (in barley, Saade et al., 2016) and drought tolerance (Venuprasad et al., 2009).

348

349 Due to the recent availability of multiple reference genomes for cultivated and wild barley,  
350 the precision of GWAS studies and ability to rapidly clone genes of interest from cereal  
351 crops is continually improving. Further studies are required to determine whether each of  
352 the traits studied are under control by a single gene or more complex genetic control within  
353 the QTL region on chromosome 7H. Further mendelisation of the 7H QTL by intercrossing  
354 select DH lines from the Y/F population will enable the development of a large [segregating](#)  
355 F<sub>2</sub> fine-mapping population for positional cloning of the 7H QTL to unravel the underlying  
356 genetic and biological mechanisms involved.

357

358 Our study focussed on a step change from moderate ( $600 \mu\text{mol m}^{-2} \text{s}^{-1}$ ) to saturating light  
359 ( $1300 \mu\text{mol m}^{-2} \text{s}^{-1}$ ), rather than low to high light as has been reported previously (i.e.  $50 -$   
360  $1500 \mu\text{mol m}^{-2} \text{s}^{-1}$  in Taylor and Long, 2017). We felt this approach would provide more  
361 valuable information for plant breeding, as it more accurately represents the light regime  
362 experienced by the second youngest leaves in the canopy, which for wheat have been  
363 reported to receive between  $300 - 700 \mu\text{mol m}^{-2} \text{s}^{-1}$  PPFD when not in a sunfleck (Townsend  
364 et al., 2018). Whilst leaves lower in the canopy receive much less light than this ( $< 300 \mu\text{mol}$   
365  $\text{m}^{-2} \text{s}^{-1}$ ), these leaves are also less likely to be exposed to sunflecks and also have a much-  
366 reduced photosynthetic capacity (Townsend et al. 2018), so contribute considerably less to  
367 whole canopy photosynthesis. Our results show that rubisco activation rates after a switch  
368 from moderate to high light in barley (median  $1/\tau = 0.28 \text{ min}^{-1}$ ) are similar to those that  
369 have been reported from low to high light in other species ( $0.3 - 0.45 \text{ min}^{-1}$  in rice, Yamori  
370 et al., 2012;  $0.24 - 0.42 \text{ min}^{-1}$  in soybean, Soleh et al., 2016; and  $0.25 - 0.33 \text{ min}^{-1}$  in wheat,  
371 Taylor and Long, 2017), albeit with greater variation. It would therefore seem that the same  
372 biochemical processes, likely related to the amount of and form of rubisco activase present  
373 in the leaves (Carmo-Silva and Salvucci, 2013), are involved in photosynthetic induction  
374 under the two induction scenarios.

375

### 376 *Limitations and future directions*

377 Our study has focussed on rubisco activation however this is only one part of the dynamic  
378 photosynthesis puzzle, in which all the pieces must be investigated to fully understand  
379 potential improvements that could be made to whole canopy photosynthesis. Responses of  
380 stomata can also limit photosynthesis in fluctuating light. Faster stomatal opening has now

381 been shown to improve net photosynthesis and biomass production in overexpressing  
382 mutants of *Arabidopsis thaliana* compared to wild type plants (Kimura et al., 2020). And so,  
383 if improvements are made to rubisco activation rate without also considering rates of  
384 stomatal opening/closure, the dominant limitation will likely shift in the direction of the  
385 stomata. In effect, this could nullify any improvements made to rubisco activation in terms  
386 of net photosynthesis. On a positive note, recent work has highlighted that stomatal traits  
387 can be linked to rubisco kinetics during leaf development in some plant species (Conesa et  
388 al., 2019), and it has long been realised that stomata respond to photosynthetic activity in  
389 the mesophyll (Messinger et al., 2006). It is therefore conceivable that improving rubisco  
390 activation rate through targeted plant breeding could also inherently result in improved  
391 stomatal responses. Regardless, there is a definite need for future work in this area to  
392 address dynamic responses of stomata, rubisco and other biochemical processes (i.e. non-  
393 photochemical quenching) of photosynthesis together, rather than focussing on each in  
394 isolation.

395

396 In this study, we measured photosynthetic induction and identified associated QTLs in  
397 plants grown under optimal and controlled conditions. The next important step is for  
398 photosynthetic induction traits to be investigated in field grown plants with established  
399 canopies. Traditional gas exchange techniques combined with new higher throughput  
400 techniques based on thermography (for dynamic stomatal traits; Vialet-Chabrand & Lawson,  
401 2020), hyperspectral imaging and chlorophyll fluorescence (for dynamic photosynthetic  
402 parameters; McAusland et al., 2019; Meacham-Hensold et al., 2020) may offer the potential  
403 to screen these two populations in the field and validate the QTLs we identified in this  
404 study. It is also important that we understand if these QTLs are strong under sub-optimal  
405 conditions (i.e. under drought or heat stress), as for most growers such conditions can be  
406 common during a growing season.

407

#### 408 *A note on gas exchange methodology*

409 It is common practice to allow a leaf to stabilise to the chamber conditions of an IRGA, yet  
410 the recent push for “high throughput” and “big data” approaches in plant physiology may  
411 have made researchers complacent. We hypothesized that this complacency could impact  
412 detected QTLs for photosynthesis and stomatal conductance, and indeed we found that

413 using non-steady state rates (i.e. before leaves had equilibrated to chamber conditions)  
414 resulted in less accurate detection of QTLs. It is likely that false QTL identifications are  
415 worsened by the high variability in photosynthetic induction kinetics that exists across this  
416 population (and has also been found in other crop species) and the fact that there is no  
417 clear relationship between steady state and dynamic photosynthesis. This result reinforces  
418 the importance of good gas exchange technique. The push for high-throughput  
419 measurements has resulted in new fast methods, such as the Rapid  $A/c_i$  method (Stinziano  
420 et al., 2017), being developed yet it must be highlighted that most of these methods still  
421 rely on the assumption of steady state conditions and these will therefore still be limited by  
422 equilibration time.

423  
424 We suggest that plant physiologists treat this as a methodological opportunity instead of a  
425 hindrance. Rather than just waiting for the leaf to reach steady state and then recording a  
426 point measurement or photosynthetic response curve, the photosynthetic induction phase  
427 could always be logged continuously as soon as the leaf enters the chamber. Not only would  
428 this provide extra data on photosynthetic induction, it would also provide transparency and  
429 confidence in the data. Specifically, the researcher and their peers would be able to  
430 backcheck to ensure that steady state conditions had been reached. In the past, technical  
431 limitations may have prevented such an approach, but new gas exchange instruments have  
432 both the computational power and environmental control to establish this as common  
433 practice.

434

### 435 **Conclusions**

436 In this study, we found wide variation in photosynthetic induction to fluctuating light across  
437 a barley mapping population. This variation allowed us to identify a QTL for rubisco  
438 activation rate, the position of which overlapped QTLs for steady state photosynthesis and  
439 stomatal conductance. These QTLs lie close to molecular markers that could be used for  
440 selection in plant breeding programs. Future work should aim to validate these QTLs under  
441 field conditions so that they can be used to aid plant breeding efforts.

442

### 443 **Acknowledgements**



444 This work was funded by the Grains Research and Development Corporation (contract  
445 US00056). WTS was supported by the Australian Research Council (ARC), Industrial  
446 Transformation Research Hub —Legumes for Sustainable Agriculture (IH140100013) and the  
447 Grains Research and Development Corporation. The authors thank Dr Meixue Zhou,  
448 University of Tasmania for the available genotypic data and Dr Davinder Singh and Professor  
449 Robert Park for maintenance of seed of the doubled haploid barley populations.

450

## 451 **References**

452 **Acevedo-Siaca LG, Coe R, Wang Y, Kromdijk J, Quick WP, Long SP.** 2020. Variation in  
453 photosynthetic induction between rice accessions and its potential for improving  
454 productivity. *New Phytologist*, DOI: 10.1111/nph.16454.

455 **Castaneda-Alvarez NP, Khoury CK, Achicanoy HA, Bernau V, Dempewolf H, Eastwood RJ,**  
456 **Guarino L, Harker RH, Jarvis A, Maxted N, Muller JV, Ramirez-Villegas J, Sosa CC, Struik PC,**  
457 **Vincent H, Toll J.** 2016. Global conservation priorities for crop wild relatives. *Nature Plants*  
458 **2**, 6.

459 **Conesa MÀ, Muir CD, Molins A, Galmés J.** 2019. Stomatal anatomy coordinates leaf size  
460 with rubisco kinetics in the Balearic *Limonium*. *AoB PLANTS* **12**.

461 **Dracatos PM, Khatkar M, Singh D, Stefanato F, Park RF, Boyd LA.** 2016. Resistance in  
462 Australian barley (*Hordeum vulgare*) germplasm to the exotic pathogen *Puccinia striiformis*  
463 f. sp. *Hordei*, causal agent of stripe rust. *Plant Pathology* **65**, 734-743.

464 **Furbank RT, Sharwood R, Estavillo GM, Silva-Perez V, Condon AG.** 2020. Photons to food:  
465 genetic improvement of cereal crop photosynthesis. *Journal of Experimental Botany* **71**,  
466 2226-2238.

467 **Furbank RT, Tester M.** 2011. Phenomics – technologies to relieve the phenotyping  
468 bottleneck. *Trends in Plant Science* **16**, 635-644.

469 **Hammond ET, Andrews TJ, Mott KA, Woodrow IE.** 1998. Regulation of rubisco activation in  
470 antisense plants of tobacco containing reduced levels of rubisco activase. *Plant Journal* **14**,  
471 101-110.

472 **Kaiser E, Galvis VC, Armbruster U.** 2019. Efficient photosynthesis in dynamic light  
473 environments: a chloroplast's perspective. *Biochemical Journal* **476**, 2725-2741.



- 474 **Kromdijk J, Glowacka K, Leonelli L, Gabilly ST, Iwai M, Niyogi KK, Long SP.** 2016. Improving  
475 photosynthesis and crop productivity by accelerating recovery from photoprotection.  
476 *Science* **354**, 857-861.
- 477 **Lawson T, Blatt MR.** 2014. Stomatal size, speed, and responsiveness impact on  
478 photosynthesis and water use efficiency. *Plant Physiology* **164**, 1556-1570.
- 479 **McAusland L, Atkinson JA, Lawson T, Murchie EH.** 2019. High throughput procedure  
480 utilising chlorophyll fluorescence imaging to phenotype dynamic photosynthesis and  
481 photoprotection in leaves under controlled gaseous conditions. *Plant Methods* **15**, 15.
- 482 **Meacham-Hensold K, Fu P, Wu J, Serbin S, Montes CM, Ainsworth E, Guan K, Dracup E,**  
483 **Pederson T, Driever S, Bernacchi C.** 2020. Plot-level rapid screening for photosynthetic  
484 parameters using proximal hyperspectral imaging. *Journal of Experimental Botany* **71**, 2312-  
485 2328.
- 486 **Messinger SM, Buckley TN, Mott KA.** 2006. Evidence for involvement of photosynthetic  
487 processes in the stomatal response to CO<sub>2</sub>. *Plant Physiology* **140**, 771-778.
- 488 **Mott KA, Snyder GW, Woodrow IE.** 1997. Kinetics of rubisco activation as determined from  
489 gas-exchange measurements in antisense plants of *Arabidopsis thaliana* containing reduced  
490 levels of rubisco activase. *Australian Journal of Plant Physiology* **24**, 811-818.
- 491 **Murchie EH, Kefauver S, Araus JL, Muller O, Rascher U, Flood PJ, Lawson T.** 2018.  
492 Measuring the dynamic photosynthome. *Annals of Botany* **122**, 207-220.
- 493 **Paul MJ, Watson A, Griffiths CA.** 2019. Linking fundamental science to crop improvement  
494 through understanding source and sink traits and their integration for yield enhancement.  
495 *Journal of Experimental Botany* **71**, 2270-2280.
- 496 **Pearcy RW.** 1990. Sunflecks and photosynthesis in plant canopies. *Annual Review of Plant*  
497 *Physiology and Plant Molecular Biology* **41**, 421-453.
- 498 **R Core Team.** 2019. R: A language and environment for statistical computing. R Foundation  
499 for Statistical Computing. Vienna, Austria: R Foundation for Statistical Computing.
- 500 **Saade S, Maurer A, Shahid M, Oakey H, Schmockel SM, Negrao S, Pillen K, Tester M.** 2016.  
501 Yield-related salinity tolerance traits identified in a nested association mapping (NAM)  
502 population of wild barley. *Scientific Reports* **6**, 9.
- 503 **Salter WT, Merchant AM, Richards RA, Trethowan R, Buckley TN.** 2019. Rate of  
504 photosynthetic induction in fluctuating light varies widely among genotypes of wheat.  
505 *Journal of Experimental Botany* **70**, 2787-2796.

- 506 **Simkin AJ, López-Calcagno PE, Raines CA.** 2019. Feeding the world: improving  
507 photosynthetic efficiency for sustainable crop production. *Journal of Experimental Botany*  
508 **70**, 1119-1140.
- 509 **Singh, D, Dracatos PM, Derevnina L, Zhou M, Park RF.** 2014. Rph23: A new additive adult  
510 plant resistance gene to leaf rust in barley on chromosome 7H. *Plant Breeding* **134**, 62-69.
- 511 **Slattery RA, Walker BJ, Weber AP, Ort DR.** 2018. The impacts of fluctuating light on crop  
512 performance. *Plant Physiology* **176**, 990-1003.
- 513 **Soleh MA, Tanaka Y, Kim SY, Huber SC, Sakoda K, Shiraiwa T.** 2017. Identification of large  
514 variation in the photosynthetic induction response among 37 soybean [*Glycine max* (L.)  
515 Merr.] genotypes that is not correlated with steady-state photosynthetic capacity.  
516 *Photosynthesis Research* **131**, 305-315.
- 517 **Soleh MA, Tanaka Y, Nomoto Y, Iwahashi Y, Nakashima K, Fukuda Y, Long SP, Shiraiwa T.**  
518 2016. Factors underlying genotypic differences in the induction of photosynthesis in  
519 soybean [*Glycine max* (L.) Merr.] *Plant Cell and Environment* **39**, 685-693.
- 520 **South PF, Cavanagh AP, Liu HW, Ort DR.** 2019. Synthetic glycolate metabolism pathways  
521 stimulate crop growth and productivity in the field. *Science* **363**, 45-+.
- 522 **Talbott LD, Rahveh E, Zeiger E.** 2003. Relative humidity is a key factor in the acclimation of  
523 the stomatal response to CO<sub>2</sub>. *Journal of Experimental Botany* **54**, 2141-2147.
- 524 **Taylor SH, Long SP.** 2017. Slow induction of photosynthesis on shade to sun transitions in  
525 wheat may cost at least 21% of productivity. *Philosophical Transactions of the Royal Society*  
526 *B-Biological Sciences* **372**, 9.
- 527 **Townsend AJ, Retkute R, Chinnathambi K, Randall JWP, Foulkes J, Carmo-Silva E, Murchiea**  
528 **EH.** 2018. Suboptimal acclimation of photosynthesis to light in wheat canopies. *Plant*  
529 *Physiology* **176**, 1233-1246.
- 530 **Venuprasad R, Dalid CO, Del Valle M, Zhao D, Espíritu M, Cruz MTS, Amante M, Kumar A,**  
531 **Atlin GN.** 2009. Identification and characterization of large-effect quantitative trait loci for  
532 grain yield under lowland drought stress in rice using bulk-segregant analysis. *Theoretical*  
533 *and Applied Genetics* **120**, 177-190.
- 534 **Violet-Chabrand S, Lawson T.** 2020. Thermography methods to assess stomatal behaviour in  
535 a dynamic environment. *Journal of Experimental Botany* **71**, 2329-2338.
- 536 **Wang Y, Burgess SJ, de Becker EM, Long SP.** 2020. Photosynthesis in the fleeting shadows:  
537 an overlooked opportunity for increasing crop productivity? *The Plant Journal* **101**, 874-884.

- 538 **Wang Y, Noguchi K, Terashima I.** 2008. Distinct light responses of the adaxial and abaxial  
539 stomata in intact leaves of *Helianthus annuus* L. *Plant Cell and Environment* **31**, 1307-1316.
- 540 **Wenzl P, Li HB, Carling J, Zhou MX, Raman H, Paul E, Hearnden P, Maier C, Xia L, Caig V,**  
541 **Ovesna J, Cakir M, Poulsen D, Wang JP, Raman R, Smith KP, Muehlbauer GJ, Chalmers KJ,**  
542 **Kleinhofs A, Huttner E, Kilian A.** 2006. A high-density consensus map of barley linking DarT  
543 markers to SSR, RFLP and STS loci and agricultural traits. *BMC Genomics* **7**, 22.
- 544 **Xue DW, Chen MC, Zhou MX, Chen S, Mao Y, Zhang GP.** 2008. QTL analysis of flag leaf in  
545 barley (*Hordeum vulgare* L.) for morphological traits and chlorophyll content. *Journal of*  
546 *Zhejiang University-Science B* **9**, 938-943.
- 547 **Xue DW, Zhou MX, Zhang XQ, Chen S, Wei K, Zeng FR, Mao Y, Wu FB, Zhang GP.** 2010.  
548 Identification of QTLs for yield and yield components of barley under different growth  
549 conditions. *Journal of Zhejiang University-Science B* **11**, 169-176.
- 550 **Yamori W, Masumoto C, Fukayama H, Makino A.** 2012. Rubisco activase is a key regulator  
551 of non-steady-state photosynthesis at any leaf temperature and, to a lesser extent, of  
552 steady-state photosynthesis at high temperature. *Plant Journal* **71**, 871-880.
- 553 **Zeiger E, Zhu JX.** 1998. Role of zeaxanthin in blue light photoreception and the modulation  
554 of light-CO<sub>2</sub> interactions in guard cells. *Journal of Experimental Botany* **49**, 433-442.
- 555 **Zhang XC, Zhou GF, Shabala S, Koutoulis A, Shabala L, Johnson P, Li CD, Zhou MX.** 2016.  
556 Identification of aerenchyma formation-related QTL in barley that can be effective in  
557 breeding for waterlogging tolerance. *Theoretical and Applied Genetics* **129**, 1167-1177.
- 558
- 559

560 **Tables**

561 **Table 1** – QTLs for dynamic and steady state photosynthetic traits identified in the mapping  
562 population.

563

| <b>Trait</b>         | <b>QTL</b>              | <b>Chromosome</b> | <b>Position (cM)</b> | <b>Nearest Marker</b> | <b>Explained variance (%)</b> | <b>Additivity</b> | <b>LOD</b> |
|----------------------|-------------------------|-------------------|----------------------|-----------------------|-------------------------------|-------------------|------------|
| <b>1/τ</b>           | Q1/τ.sun-7H             | 7H                | 41.67                | bpb-9601              | 10.48                         | -0.07             | 4.40       |
| <b>A</b>             | QA.sun-2H               | 2H                | 27.03                | bpb-0003              | 9.20                          | -3.85             | 4.31       |
| <b>A</b>             | QA.sun-4H               | 4H                | 66.68                | bpb-2305              | 5.84                          | -4.37             | 2.64       |
| <b>A</b>             | QA.sun-7H               | 7H                | 41.67                | bpb-9601              | 10.80                         | -4.30             | 5.18       |
| <b>g<sub>s</sub></b> | Qg <sub>s</sub> .sun-2H | 2H                | 35.91                | bpb-8750              | 11.80                         | -0.09             | 5.41       |
| <b>g<sub>s</sub></b> | Qg <sub>s</sub> .sun-5H | 5H                | 53.39                | bpb-5532              | 6.49                          | 0.07              | 2.98       |
| <b>g<sub>s</sub></b> | Qg <sub>s</sub> .sun-7H | 7H                | 41.28                | bpb-4989              | 13.75                         | -0.11             | 6.80       |

564

565

566 **Table 2** – Distribution features for photosynthetic rate ( $A$ ) and stomatal conductance ( $g_s$ )  
567 across the population at 5, 10 and 15 minutes into photosynthetic induction.  
568

| Trait                                           | Time point (minutes) | Minimum | 25% Percentile | Median | 75% Percentile | Maximum | Mean  |
|-------------------------------------------------|----------------------|---------|----------------|--------|----------------|---------|-------|
| $A$<br>( $\mu\text{mol m}^{-2} \text{s}^{-1}$ ) | 5                    | 7.1     | 16.5           | 20.0   | 24.9           | 36.5    | 20.4  |
|                                                 | 10                   | 9.6     | 20.0           | 23.3   | 26.9           | 40.2    | 23.4  |
|                                                 | 15                   | 12.2    | 21.5           | 24.9   | 28.4           | 41.8    | 25.0  |
| $g_s$<br>( $\text{mmol m}^{-2} \text{s}^{-1}$ ) | 5                    | 0.044   | 0.259          | 0.365  | 0.522          | 0.947   | 0.397 |
|                                                 | 10                   | 0.069   | 0.294          | 0.392  | 0.508          | 0.947   | 0.412 |
|                                                 | 15                   | 0.107   | 0.330          | 0.441  | 0.544          | 0.940   | 0.451 |

569

570

571 **Figures**

572 **Figure 1** – Example of a typical leaf photosynthetic induction response and the linear  
573 regression used to calculate rubisco activation rate ( $1/\tau$ ). The orange crosses represent the  
574 measured photosynthetic rate  $A$ ; the grey squares the  $c_i = 300 \mu\text{mol mol}^{-1}$  normalised  
575 photosynthetic rate  $A^*$ ; and the blue circles the logarithmic difference between the fully  
576 induced photosynthetic rate  $A^*_{\text{max}}$  and  $A^*$ . Filled circles represent the data points used in the  
577 linear regression to estimate  $1/\tau$ , the rubisco activation rate. The slope of the regression  
578 represents  $1/\tau$ , in this case  $0.31 \text{ min}^{-1}$ .

579

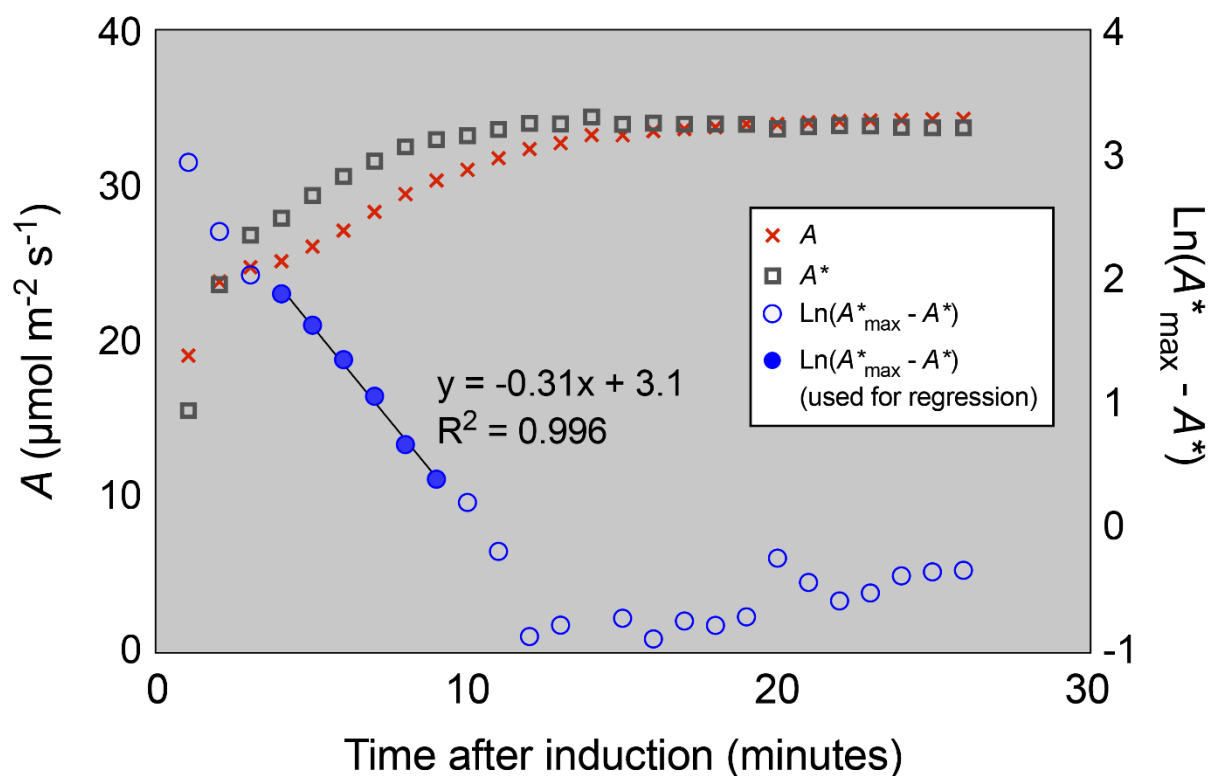

580

581 **Figure 2** – Induction curves for net photosynthesis,  $A$  (red crosses); stomatal conductance,  $g_s$  (blue triangles); and  $c_i = 300$  ppm normalised photosynthesis,  $A^*$  (grey squares), after a  
582 switch from moderate to saturating light. Data shown in panels (a) – (i) are representative  
583 induction curves from one day of measurements in individual plants. The value of  $1/\tau$  is  
584 shown in each panel for reference.  
585  
586

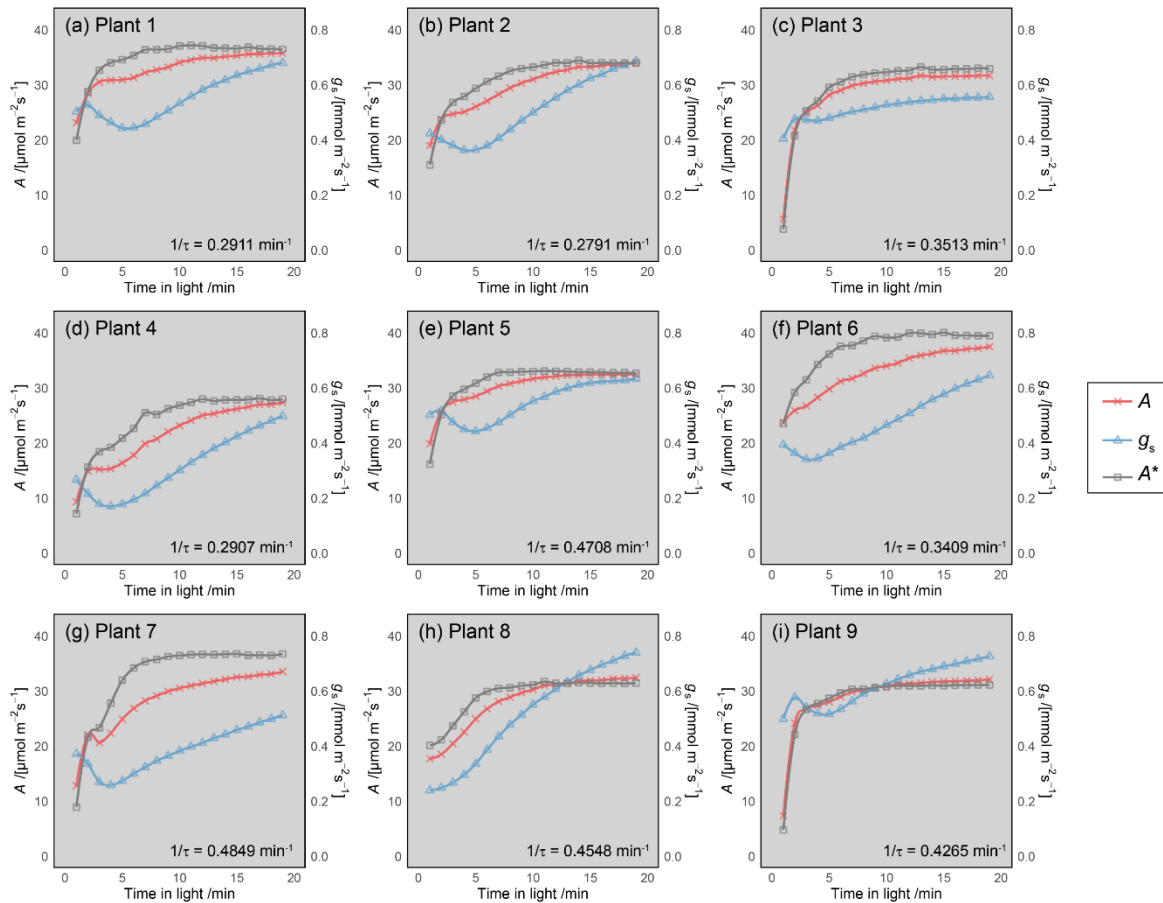

587

588

589

590 **Figure 3** – Distribution of rubisco activation rate ( $1/\tau$ ) across genotypes of the  
591 Yerong/Franklin DH population. Each bar represents a single genotype. Parental lines are  
592 highlighted. Colours are arbitrary.

593

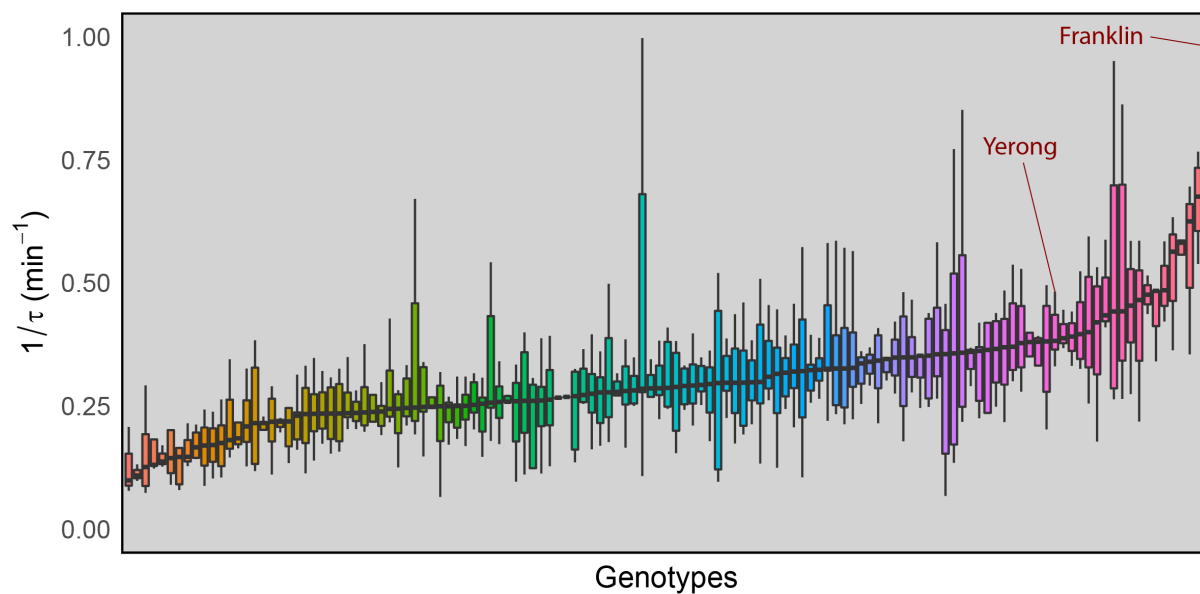

594

595



596 **Figure 4** – Logarithm of odds (LOD) traces from composite interval QTL mapping analysis for  
597  $1/\tau$ . LOD values are plotted against the position on the chromosomes. The significance  
598 threshold LOD of 2.5 is indicated by the dotted line in each plot. Vertical dashed red lines  
599 represent identified QTLs.

600

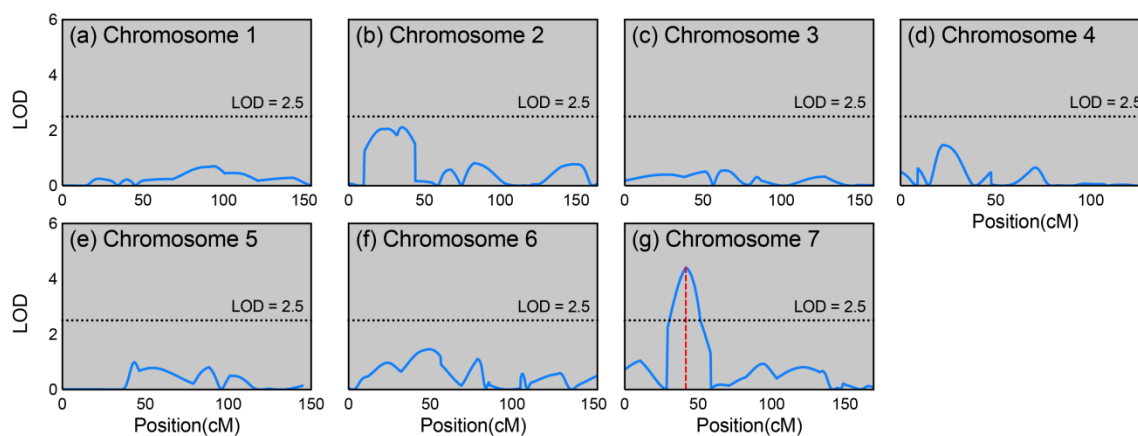

601

602

603 **Figure 5** – Distribution of steady state (a)  $A$  and (b)  $g_s$  across genotypes of the  
604 Yerong/Franklin population. Each bar represents a single genotype. Parental lines are  
605 highlighted. Note that colours are arbitrary but are consistent for genotypes in panels (a)  
606 and (b).  
607

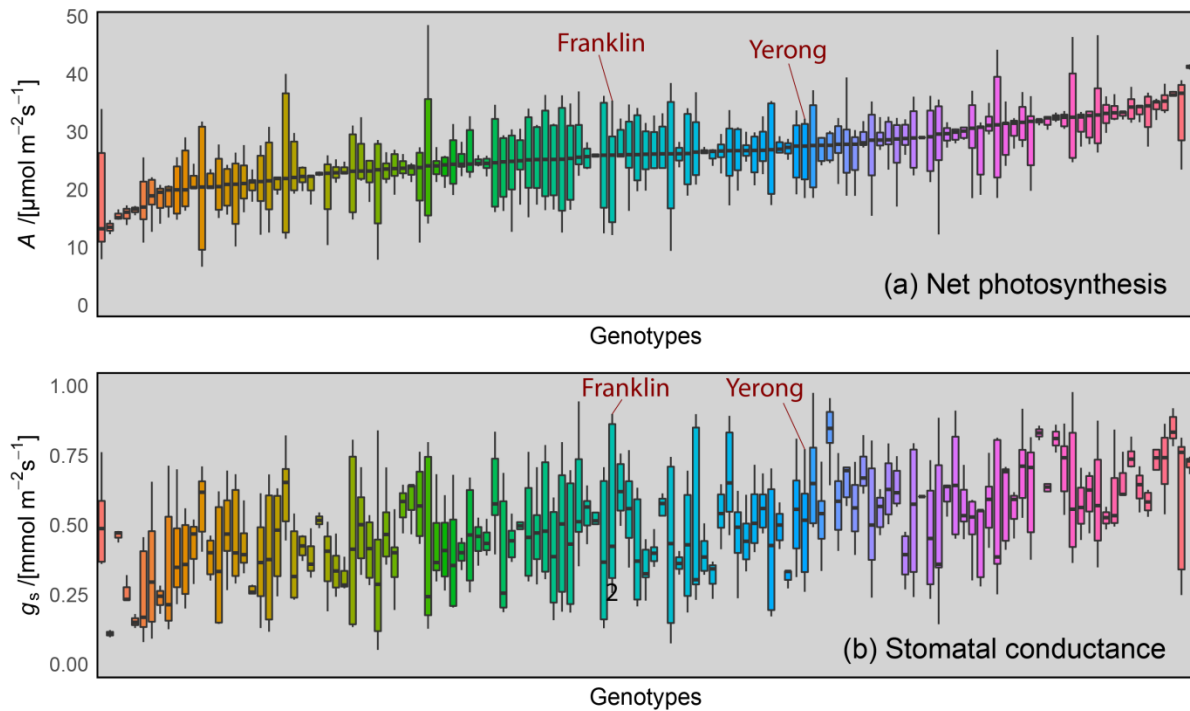

608

609

610 **Figure 6** – Relationship between steady state  $A$  and  $1/\tau$ . Each point represents a genotype.

611 Values are genotype means.

612

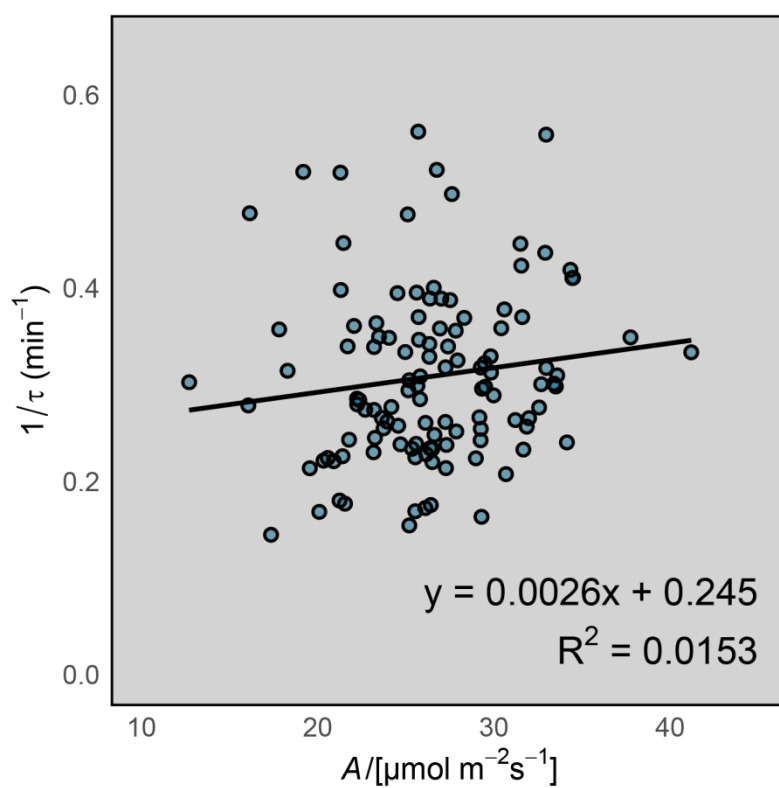

613

614 **Figure 7** – Logarithm of odds (LOD) traces from composite interval QTL mapping analysis for  
615 *A* and *g<sub>s</sub>* in the Yerong/Franklin DH population. LOD values are plotted against the cM  
616 position on chromosomes 2H, 4H, 5H and 7H. The threshold LOD of 2.5 is indicated by the  
617 horizontal dotted line in each plot. Note that LOD plots for chromosomes 1H, 3H and 6H are  
618 not shown as there were no significant QTLs identified on these chromosomes.

619

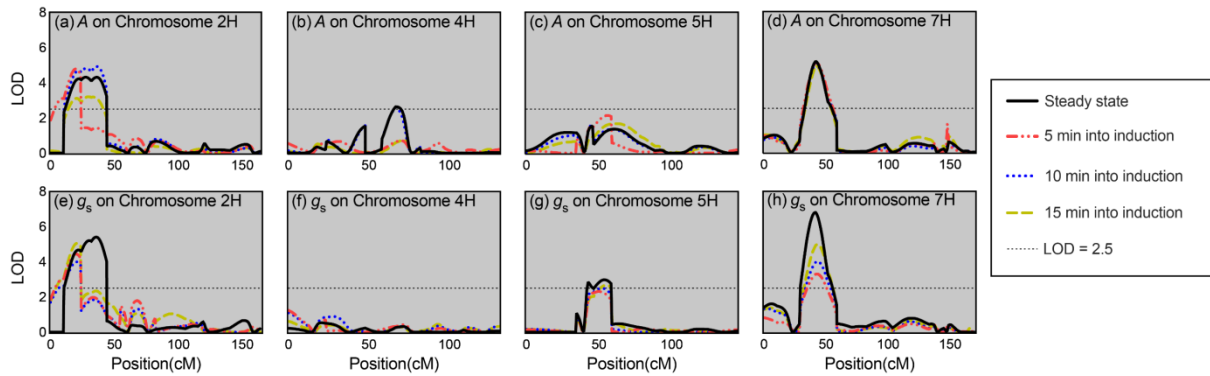

620

621

622 **Supplementary figures**

623 **Figure S1** – Photosynthetic light response curves measured on plants of the parental line

624 Dash grown under the same growth conditions as experimental plants. Curves were fitted to

625 a non-rectangular hyperbola model using non-linear least squares in R (*nls*; R Language and

626 Environment) as per Salter *et al.* (2019). Vertical dashed lines are shown at  $600 \mu\text{mol m}^{-2} \text{s}^{-1}$

627 and  $1300 \mu\text{mol m}^{-2} \text{s}^{-1}$  to highlight the moderate to high light induction phase measured in

628 this study.

629

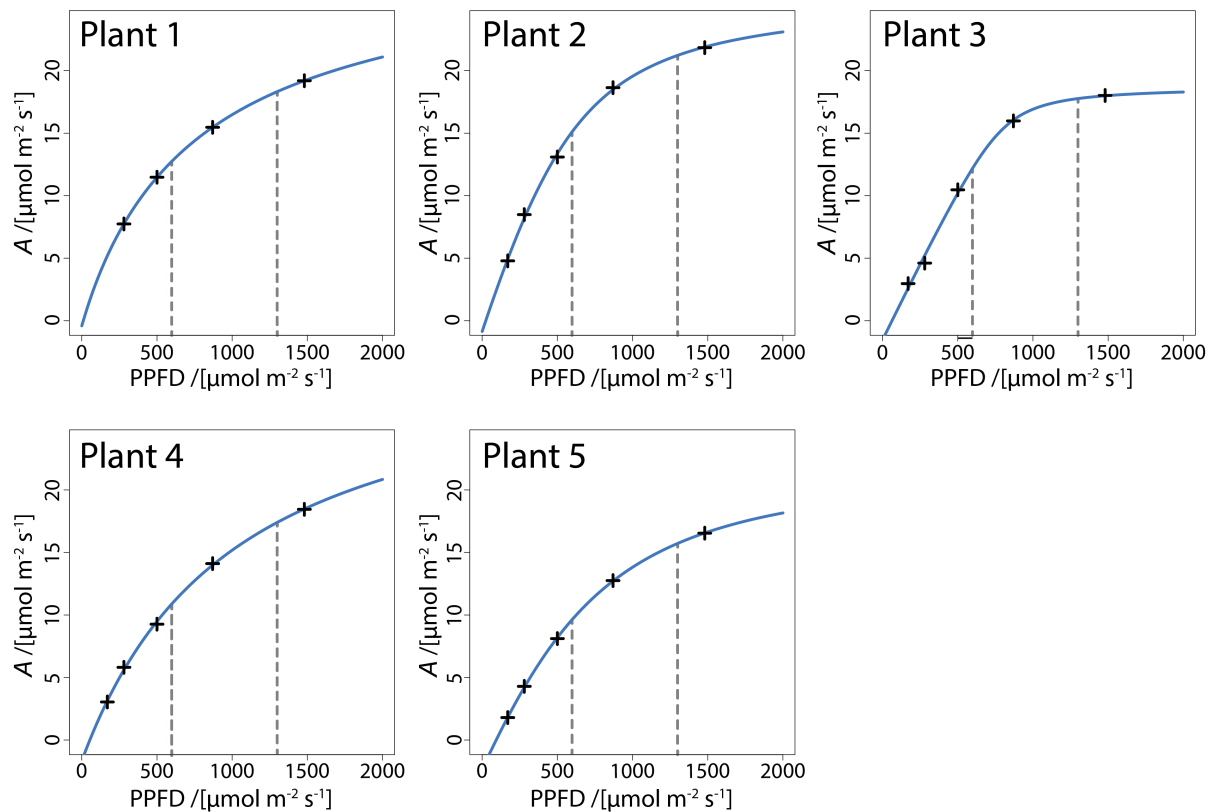

630

631

632

633 **Figure S2** – Frequency distributions of  $1/\tau$  for the Y/F DH population.

634

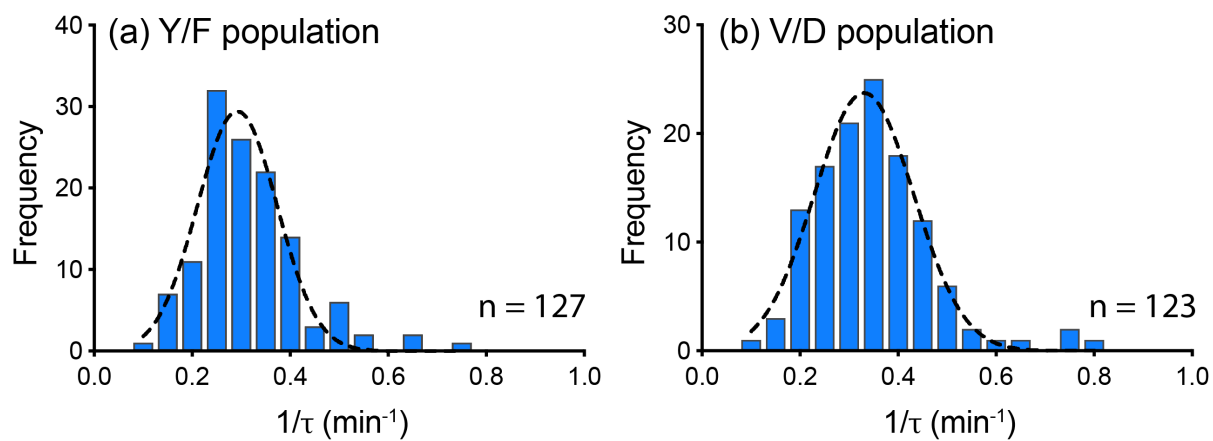

635

636

637 **Figure S3** – Frequency distributions of steady-state (a)  $A$  and (b)  $g_s$  for the Y/F DH  
638 population.  
639

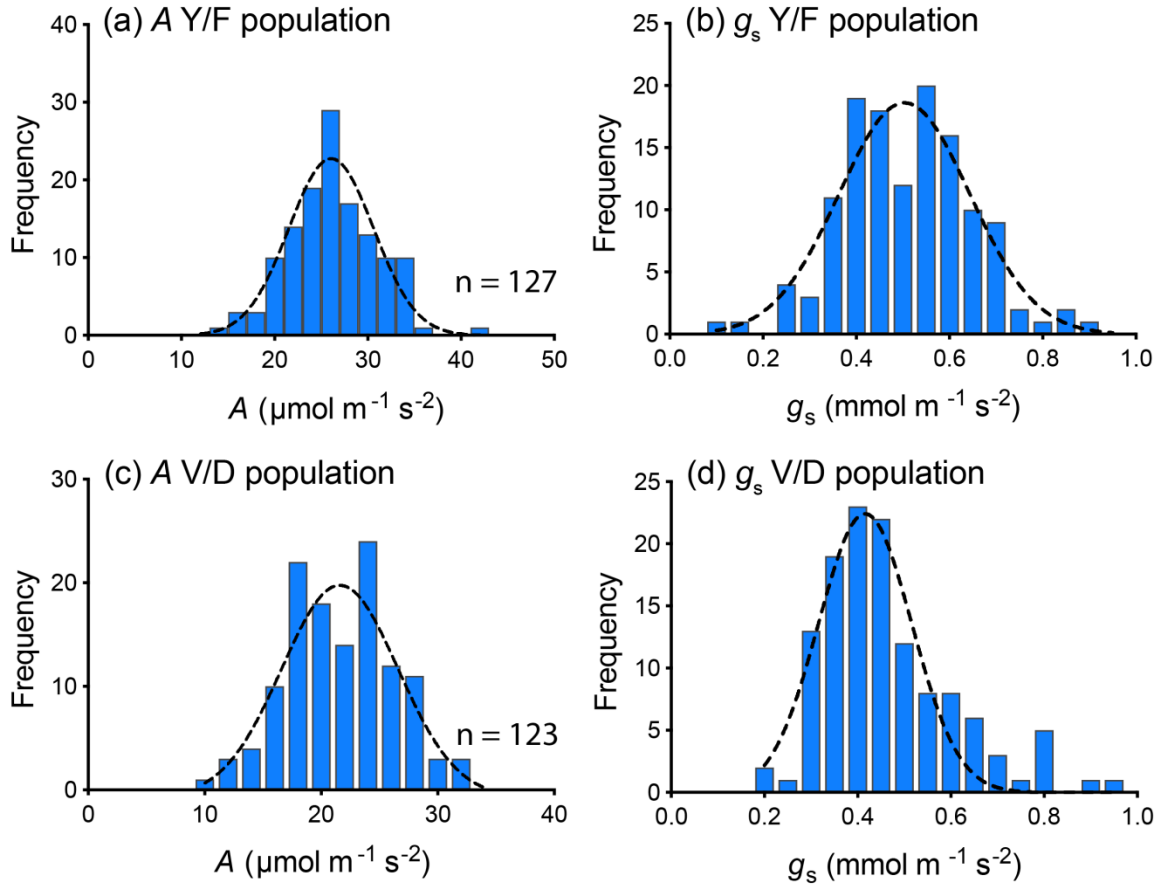

640

641

642 **Figure S4** - Distribution of rubisco activation rate ( $1/\tau$ ) across genotypes of the V/D DH  
643 population. Each bar represents a single genotype. Parental lines are highlighted. Colours  
644 are arbitrary.

645

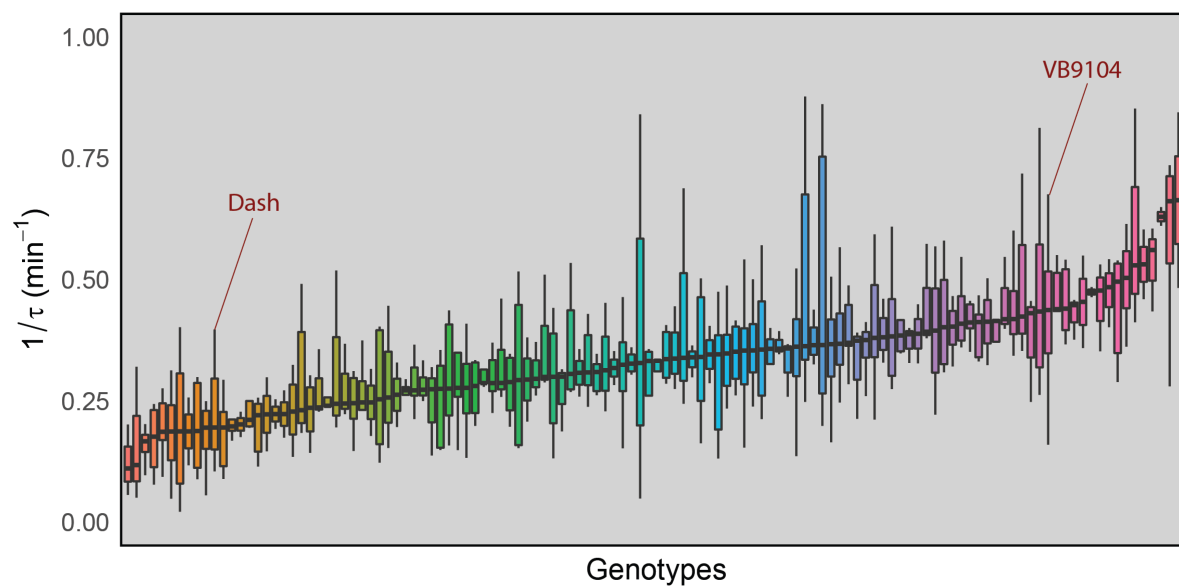

646

647



648 **Figure S5** - Distribution of steady state (a)  $A$  and (b)  $g_s$  across genotypes of the VB9104/Dash  
649 population. Each bar represents a single genotype. Parental lines are highlighted. Note that  
650 colours are arbitrary but are consistent for genotypes in panels (a) and (b).

651

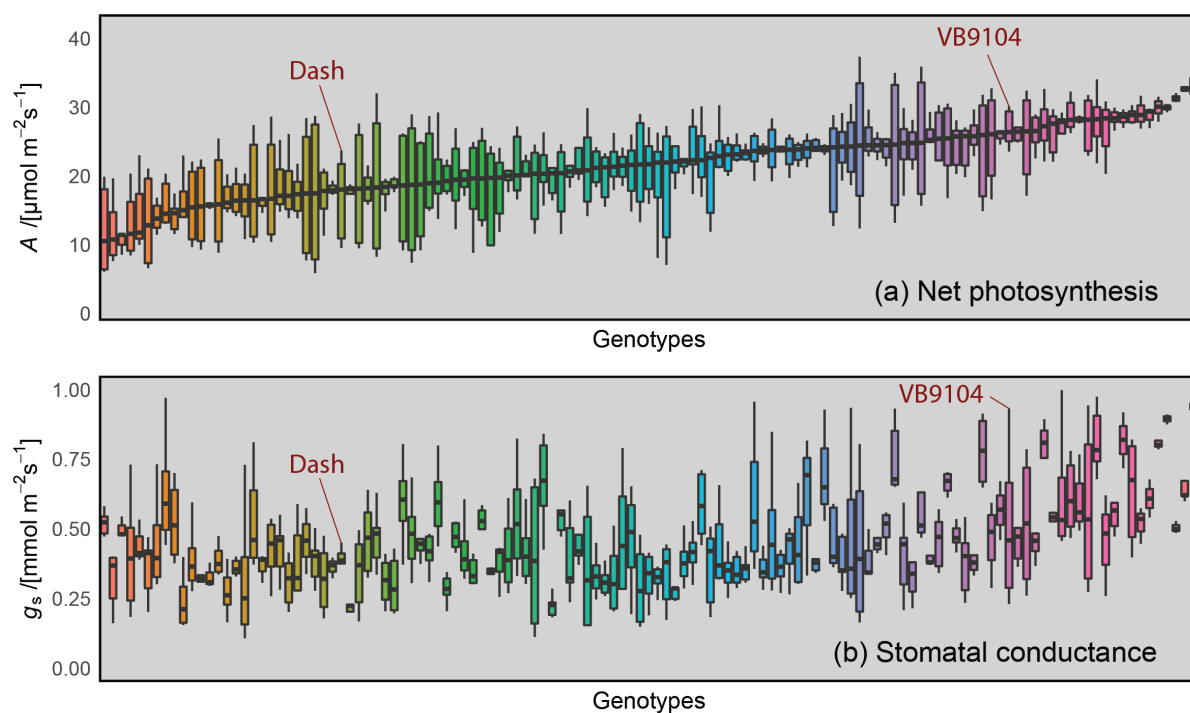

652

653

654 **List of supplementary files**

655 *FileS1.xlsx* – Yerong/Franklin dynamic and steady state gas exchange phenotypic data.

656 *FileS2.xlsx* – Results of composite interval mapping of dynamic and steady state

657 photosynthetic traits.
